# Supplementary material for: Synthesis, characterization and thermal properties of trimetallic N3–CrCr⋯M–N3 azide complexes with M = Cr, Mn, Fe, and Co
Source: Royal Society of Chemistry journal article supplement (doi:10.1039/c2dt30150d), 2012-01-01
Supplement: c2dt30150d.pdf [file c2dt30150d.pdf]

# **Synthesis, Characterization and Thermal Properties of Trimetallic $\text{N}_3\text{-Cr}\equiv\text{Cr}\cdots\text{M-N}_3$ Azide Complexes with $\text{M} = \text{Cr, Mn, Fe, and Co}$**

## **Supporting Information**

**Yevgeniya Turov and John F. Berry\***

Department of Chemistry, University of Wisconsin – Madison,  
Madison, WI 53706, USA  
E-mail: berry@chem.wisc.edu

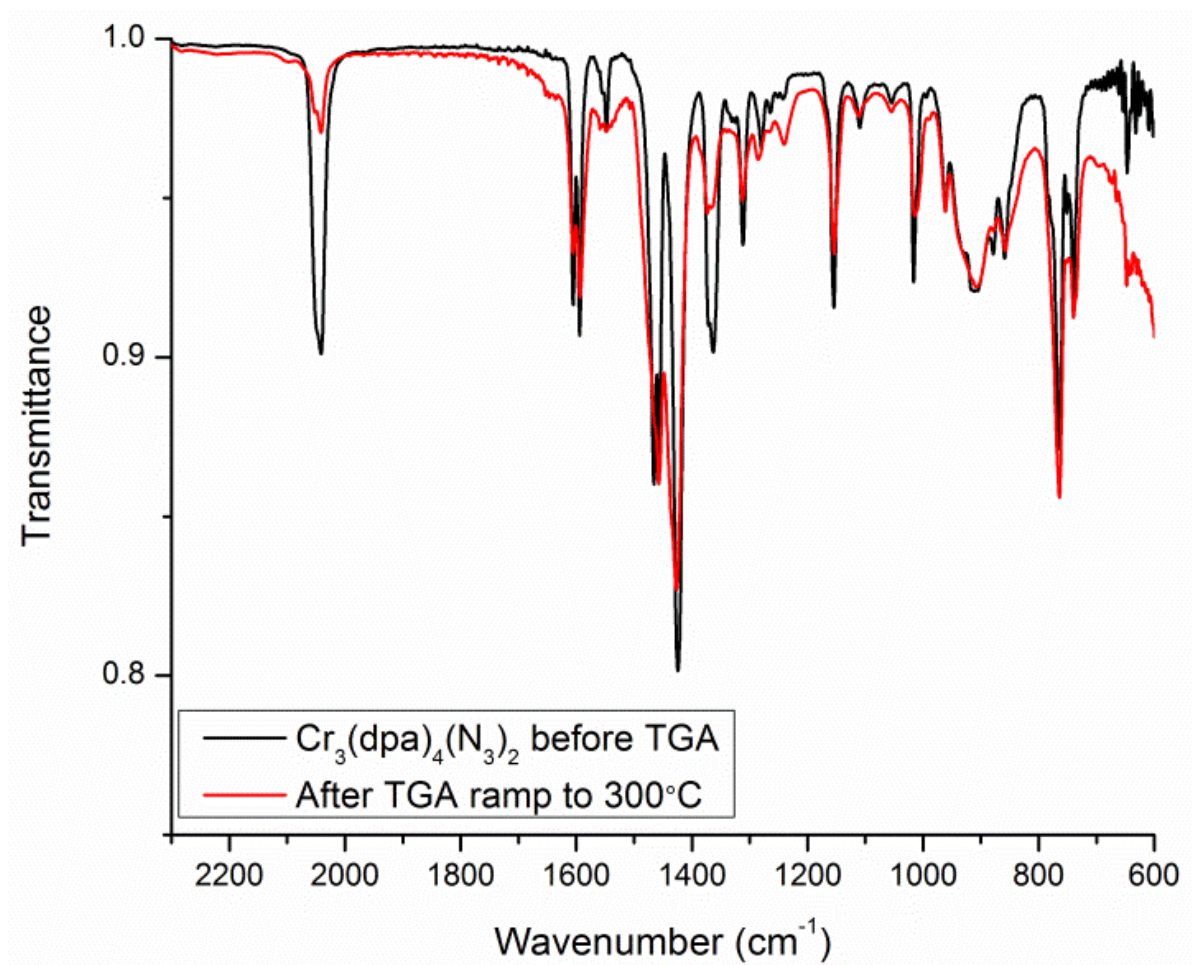

**Fig. S1.** IR of **10** and the products resulting from heating to 300 °C by TGA.

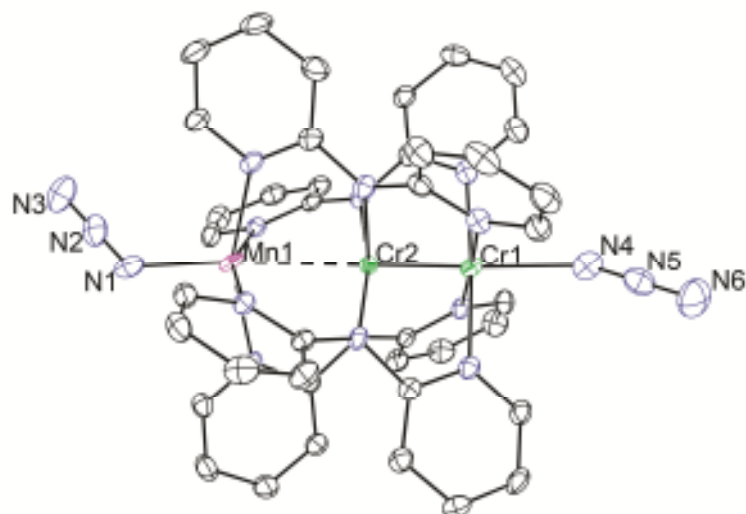

**Fig. S2.** Crystal structure of **4** with thermal ellipsoids shown at 50% probability. Hydrogen atoms, solvent molecule, and alternative orientation not shown for clarity.

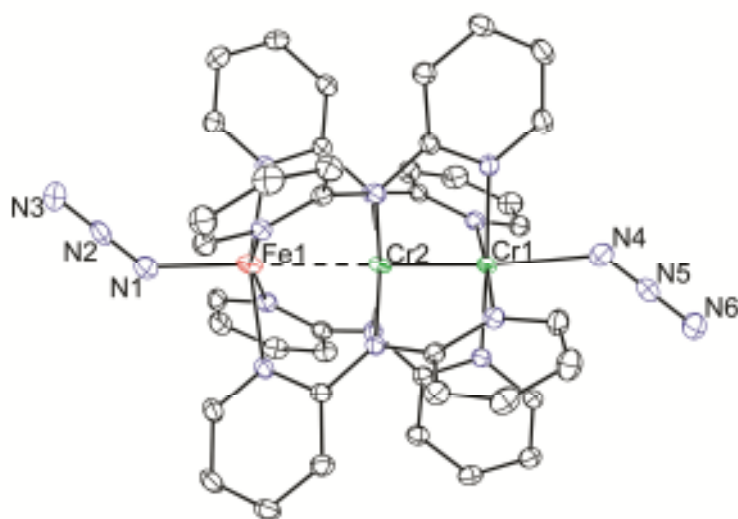

**Fig. S3.** Crystal structure of **5** with thermal ellipsoids shown at 50% probability. Hydrogen atoms, solvent molecule, and alternative orientation not shown for clarity.
